# Supplementary material for: Ultrathin NiO nanosheets anchored to a nitrogen-doped dodecahedral carbon framework for aqueous potassium-ion hybrid capacitors
Source: Royal Society of Chemistry journal article supplement (doi:10.1039/d4ta01608d), 2024-01-01
Supplement: d4ta01608d1.pdf [file d4ta01608d1.pdf]

**Ultrathin NiO Nanosheets Anchored to A Nitrogen-Doped Dodecahedral  
Carbon Framework for Aqueous Potassium-Ion Hybrid Capacitors**

## Supporting Figures

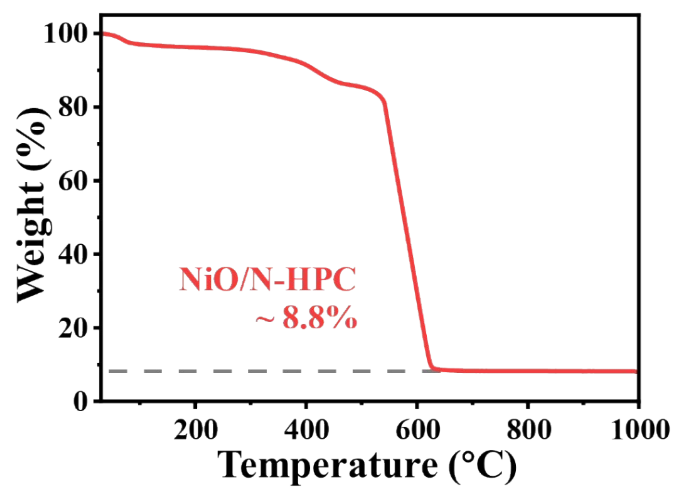

**Fig. S1.** TGA curve of NiO/N-HPC under oxygen atmosphere.

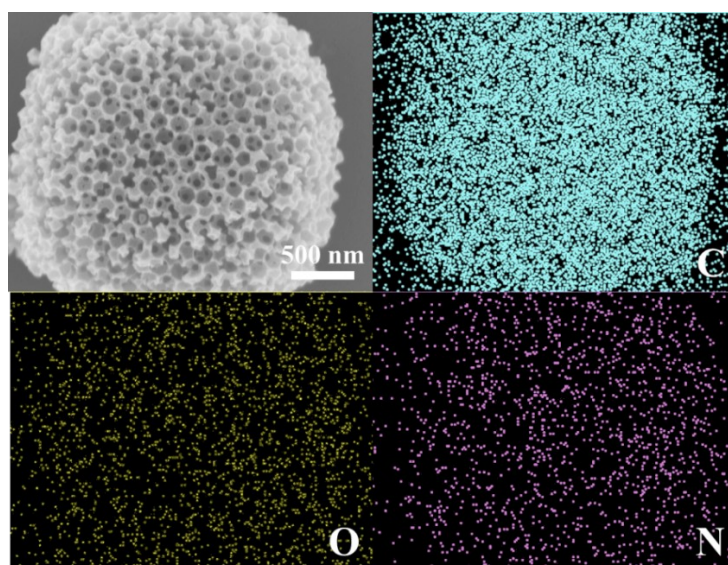

**Fig. S2.** SEM image and corresponding EDS mappings of N-HPC.

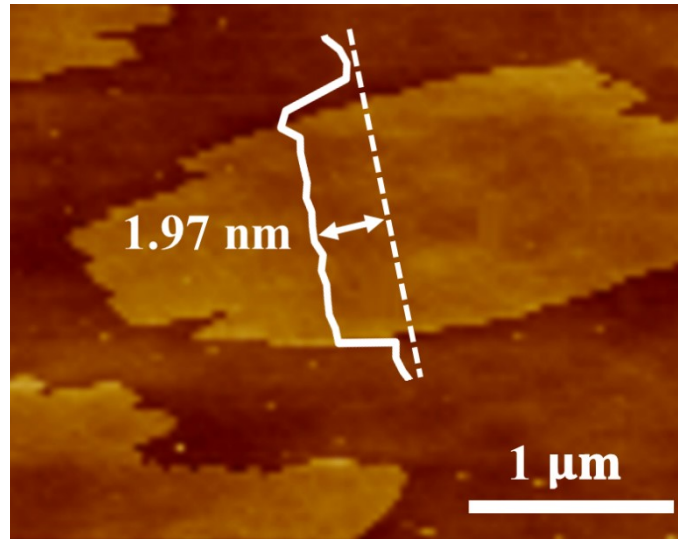

**Fig. S3.** AFM image of the NiO nanosheet from NiO/N-HPC and its corresponding height profile.

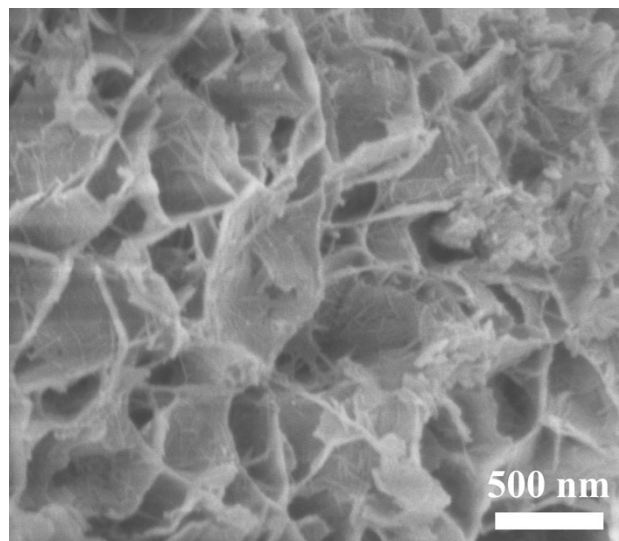

**Fig. S4.** SEM image of bulk NiO.

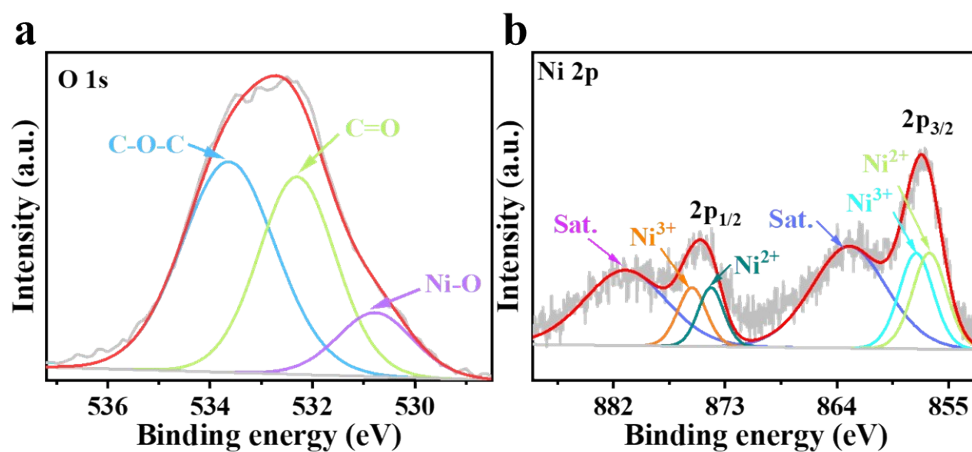

Fig. S5. High resolution XPS survey spectra of a) O 1s and b) Ni 2p in Ni(OH)<sub>2</sub>/N-HPC.

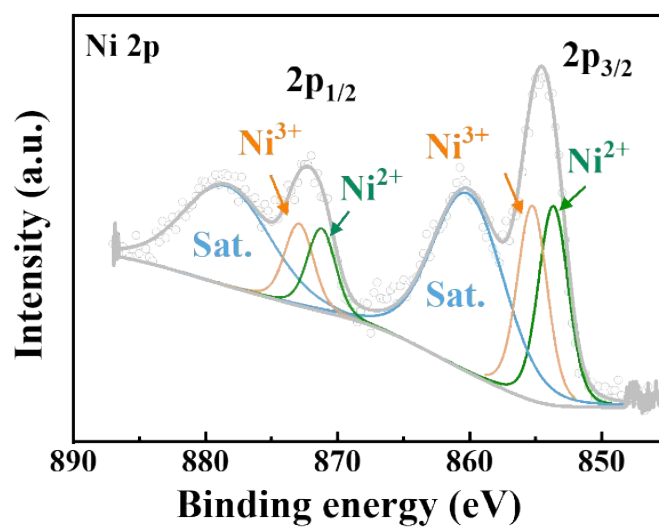

Fig. S6. High-resolution XPS spectrum for Ni 2p of NiO/N-HPC after cycling process.

**Table S1.** Comparison of energy and power density of the NiO/N-HPC//N-HPC APIHC with other reported works.

|                                                            | Energy density<br>(Wh kg <sup>-1</sup> ) | Power density<br>(W kg <sup>-1</sup> ) | Ref.                                                   |
|------------------------------------------------------------|------------------------------------------|----------------------------------------|--------------------------------------------------------|
| SC//Zn-NiHCF                                               | 9.16                                     | 153                                    | <i>J. Energy Storage</i> 2020, <b>31</b> , 101667.     |
| Co <sub>9</sub> S <sub>8</sub> @Ni(OH) <sub>2</sub> //AC   | 12.5                                     | 252.8                                  | <i>J. Mater. Chem. A</i> 2017, <b>5</b> , 22782-22789. |
| NiCo <sub>2</sub> O <sub>4</sub> @MnO <sub>2</sub> //AG    | 9.4                                      | 175                                    | <i>J. Power Sources</i> 2014, <b>270</b> , 426-433.    |
| MnO <sub>2</sub> /MGC//MGC                                 | 6.8                                      | 62                                     | <i>ACS Nano</i> 2013, <b>7</b> , 174-182.              |
| AC//PB                                                     | 28                                       | 214                                    | <i>Electrochim. Acta</i> 2017, <b>232</b> , 106-113.   |
| CoMn <sub>2</sub> O <sub>4</sub> //graphene                | 7.4                                      | 1900                                   | <i>Electrochim. Acta</i> 2014, <b>146</b> , 429-436.   |
| α-Co(OH) <sub>2</sub> /Co <sub>3</sub> O <sub>4</sub> //AC | 22.4                                     | 290                                    | <i>Electrochim. Acta</i> 2014, <b>141</b> , 234-240.   |
| NiCo <sub>2</sub> O <sub>4</sub> //FeSe <sub>2</sub>       | 22.4                                     | 163                                    | <i>J. Mater. Chem. A</i> 2017, <b>5</b> , 5568-5576.   |
| NiO/N-HPC//N-HPC                                           | 21.95                                    | 9000                                   | This work                                              |
